# Supplementary material
Source: publisher figshare collection journal article supplement (https://gsajournals.figshare.com/ndownloader/files/30829522)
Supplement: Supplementary file 1 [file 30829522]

ID	Tail	Fam	Year
094A-1	Low Geosmin	4105	2017
098A-1	High Geosmin	4124	2017
098A-2	High Geosmin	4124	2017
101B-1	High Geosmin	4167	2017
101B-2	High Geosmin	4167	2017
104A-1	Low Geosmin	4086	2017
104A-2	Low Geosmin	4086	2017
104B-1	Low Geosmin	4047	2017
104B-2	Low Geosmin	4047	2017
106A-1	High Geosmin	4143	2017
111B-1	Low Geosmin	4105	2017
113A-1	Low Geosmin	4000	2017
1711-1	High Geosmin	4160	2019
1711-2	High Geosmin	4160	2019
1715-2	Low Geosmin	4037	2019
1727-1	Low Geosmin	4053	2019
1728-1	Low Geosmin	4047	2019
1728-2	Low Geosmin	4047	2019
1738-2	High Geosmin	4124	2019
1742-1	Low Geosmin	4027	2019
1742-2	Low Geosmin	4027	2019
1746-1	High Geosmin	4064	2019
1746-2	High Geosmin	4064	2019
1748-2	Low Geosmin	4086	2019
1759-1	High Geosmin	4055	2019
1759-2	High Geosmin	4055	2019
1764-2	High Geosmin	4125	2019
1766-2	Low Geosmin	4001	2019
1775-2	High Geosmin	4143	2019
1776-2	High Geosmin	4078	2019
1780-1	Low Geosmin	4105	2019
1780-2	Low Geosmin	4105	2019
1791-1	High Geosmin	4167	2019
1793-1	Low Geosmin	4105	2019
1793-2	Low Geosmin	4105	2019
1809-1	Low Geosmin	4086	2019
1814-1	High Geosmin	4160	2019
1814-2	High Geosmin	4160	2019
1817-2	High Geosmin	4143	2019
1824-1	Low Geosmin	4144	2019
1824-2	Low Geosmin	4144	2019
1831-1	High Geosmin	4125	2019
1831-2	High Geosmin	4125	2019
1847-1	Low Geosmin	4027	2019
1847-2	Low Geosmin	4027	2019
1854-1	High Geosmin	4133	2019
1855-2	Low Geosmin	4037	2019
1859-1	High Geosmin	4055	2019
1859-2	High Geosmin	4055	2019
1862-1	Low Geosmin	4120	2019
1862-2	Low Geosmin	4120	2019
1865-1	High Geosmin	4124	2019
1865-2	High Geosmin	4124	2019
1868-1	Low Geosmin	4002	2019
1868-2	Low Geosmin	4002	2019
1878-1	High Geosmin	4064	2019
1878-2	High Geosmin	4064	2019
1883-1	Low Geosmin	4001	2019
1891-1	High Geosmin	4167	2019
1891-2	High Geosmin	4167	2019
295B-1	High Geosmin	4160	2017
297A-2	High Geosmin	4054	2017
297B-2	High Geosmin	4064	2017
303B-1	High Geosmin	4143	2017
303B-2	High Geosmin	4143	2017
304B-1	High Geosmin	4133	2017
304B-2	High Geosmin	4133	2017
309B-1	Low Geosmin	4131	2017
310B-1	Low Geosmin	4002	2017
310B-2	Low Geosmin	4002	2017
498A-1	Low Geosmin	4047	2017
498A-2	Low Geosmin	4047	2017
498B-1	High Geosmin	4162	2017
498B-2	High Geosmin	4162	2017
500B-1	Low Geosmin	4027	2017
502B-2	High Geosmin	4078	2017
503B-1	Low Geosmin	4086	2017
506B-1	Low Geosmin	4001	2017
512B-2	Low Geosmin	4144	2017
689A-1	Low Geosmin	4052	2017
690A-2	High Geosmin	4078	2017
690B-1	Low Geosmin	4037	2017
690B-2	Low Geosmin	4037	2017
705A-2	High Geosmin	4064	2017
706A-1	High Geosmin	4055	2017
706B-2	High Geosmin	4125	2017
707A-2	Low Geosmin	4027	2017
